# Supplementary material
Source: publisher figshare collection journal article supplement (https://karger.figshare.com/articles/dataset/_/19982024)
Supplement: Supplementary file 1 [file 1]

**Supplementary Table 1 – Between group differences: completers versus patients lost to follow-up**

|  | **Characteristics** | | **Inclusions (n=102)** | **Mean (SD) / Median (IQR [range]) / n (%)** | **Lost to follow-up (n=49)** | **Mean (SD) / Median (IQR [range]) / n (%)** | **P** |
| --- | --- | --- | --- | --- | --- | --- | --- |
| **Preoperative characteristics** | | |  |  |  |  |  |
|  | Age, years† |  | | 72 (5 [68 - 74]) |  | 71 (9 [68 – 78]) | 0.323 |
|  | Body mass index§ | |  | 28.0 (5.7) |  | 23.3 (6.4) | 0.528 |
|  | Female, n(%)ǂ | |  | 49 (48%) |  | 27 (55%) | 0.416 |
|  | **Medical history, n(%)ǂ** | |  |  |  |  |  |
|  | Hypertension | |  | 48 (47%) |  | 21 (43%) | 0.627 |
|  | Cerebrovascular disease | |  | 8 (8%) |  | 2 (4%) | 0.384 |
|  | Diabetes mellitus type 2 | |  | 22 (22%) |  | 8 (16%) | 0.450 |
|  | **Intoxications, n(%)ǂ** | |  |  |  |  |  |
|  | Smoking | |  | 32 (31%) |  | 18 (37%) | 0.512 |
|  | Alcohol | |  | 37 (36%) |  | 16 (33%) | 0.662 |
|  | **Lab** | |  |  |  |  |  |
|  | Sodium† | | *96 (94%)* | 140 (3 [139 – 141]) | *37 (76%)* | 141 (3.5 [139 – 141]) | 0.455 |
|  | Creatinine† | | *98 (95%)* | 86 (29.5 [72 – 105]) | *44 (90%)* | 74.5 (23.5 [70 – 107]) | 0.803 |
|  | HbA1c§ | | *56 (49%)* | 39 (15) | *23 (47%)* | 38.5 (9) | 0.961 |
|  | **ASA physical status classificationǂ** | |  |  |  |  | 0.922 |
|  | I | |  | 5 (5%) |  | 3 (6%) |  |
|  | II | |  | 57 (56%) |  | 25 (51%) |  |
|  | III | |  | 38 (37%) |  | 20 (41%) |  |
|  | IV | |  | 2 (2%) |  | 1 (2%) |  |
|  | **Preoperative TICS-M score**§ | |  | 35.5 (3.7) |  | 34.7 (4.8) | 0.526 |
|  | **Preoperative Geriatric 8 score**† | | *59 (58%)* | 15 (3 [13 – 16]) | *49 (100%)* | 14 (5 [13 – 16]) | 1.000 |
| **Surgical characteristics** | | |  |  |  |  |  |
|  | Cardiac surgeryǂ | |  | 15 (15%) |  | 7 (14%) | 0.945 |
|  | **Surgical risk stratificationǂ#** | |  |  |  |  | 0.221 |
|  | Minor | |  | 58 (57%) |  | 33 (67%) |  |
|  | Moderate | |  | 28 (27%) |  | 13 (39%) |  |
|  | Major | |  | 16 (16%) |  | 3 (6%) |  |

* = p ≤ 0.05 / ** = p ≤ 0.01
† = Mann-Whitney U test
ǂ = χ2 test
§ = Student's t-test
ASA = American Society of Anesthesiologists
# = Based on the Cardiac Risk Stratification for Non-cardiac Surgical Procedures
TICS-M = Modified Telephone Interview for Cognitive Status
